# Supplementary material for: Nuclear Microsatellite Primers for the Endangered Relict Fir, Abies pinsapo (Pinaceae) and Cross-Amplification in Related Mediterranean Species
Source: PubMed Central journal article supplement (PMC3509577; doi:10.3390/ijms131114243), 2012-11-05
Supplement: ijms-13-14243-s001.pdf [file ijms-13-14243-s001.pdf]

## Supplementary Information

**Table 1.** Geographical data of *Abies* populations used in this study and Herbarium Voucher from University of Seville. *N* = number individuals sampled.

| Species                   | Population                     | Country | Coordinates            | <i>N</i> | Voucher   |
|---------------------------|--------------------------------|---------|------------------------|----------|-----------|
| <i>Abies pinsapo</i>      | Sierra de las Nieves           | Spain   | 36°41'47"N, 05°01'37"E | 10       | SEV77675  |
|                           | Sierra de Grazalema            | Spain   | 36°46'13"N, 05°24'52"E | 10       | SEV68656  |
|                           | Sierra Bermeja                 | Spain   | 36°29'13"N, 05°12'26"E | 10       | SEV35720  |
| <i>A. alba</i>            | Mata de Valencia               | Spain   | 42°38'01"N, 01°04'45"E | 2        | SEV264618 |
|                           | Sierra de Montseny             | Spain   | 41°46'38"N, 02°26'44"E | 1        | SEV264619 |
|                           | Rothwald                       | Austria | 47°45'18"N, 15°02'46"E | 2        | -         |
| <i>A. boissii-regis</i>   | Tríkala                        | Turkey  | 39°39'11"N, 21°22'21"E | 3        | SEV278034 |
|                           | Metsovo                        | Turkey  | 39°45'15"N, 21°10'52"E | 2        | SEV278033 |
| <i>A. bornmuelleriana</i> | Kostamonu                      | Turkey  | 41°03'21"N, 33°27'01"E | 3        | SEV278038 |
|                           | Sinop                          | Turkey  | 41°25'38"N, 34°34'08"E | 2        | SEV278037 |
| <i>A. cephalonica</i>     | Oros Aenos Kefalonia           | Greece  | 38°09'24"N, 20°39'41"E | 2        | -         |
|                           | Kalavryta                      | Greece  | 38°04'23"N, 22°07'30"E | 2        | SEV278031 |
|                           | Oros Pateras                   | Greece  | 38°08'38"N, 23°18'40"E | 1        | SEV256671 |
| <i>A. cilicica</i>        | Gidengelmez Dağları Milli Park | Turkey  | 37°12'06"N, 31°48'06"E | 1        | SEV273455 |
|                           | Isparta. Asagigokdere          | Turkey  | 37°35'20"N, 30°49'01"E | 2        | SEV273454 |
|                           | Antalya                        | Turkey  | 37°11'54"N, 31°08'12"E | 2        | SEV273452 |
| <i>A. equi-trojani</i>    | Kazdagi                        | Turkey  | 39°42'00"N, 26°49'48"E | 5        | SEV278039 |
| <i>A. nebrodensis</i>     | Vallone Madonna degli Angeli   | Italy   | 37°52'32"N, 14°02'25"E | 3        | SEV256715 |
| <i>A. nordmanniana</i>    | Región de Giresun              | Turkey  | 40°24'37"N, 38°23'58"E | 3        | SEV278035 |
|                           | Ordu                           | Turkey  | 40°35'17"N, 37°40'53"E | 2        | SEV278036 |
| <i>A. numidica</i>        | Edough                         | Algeria | 36°33'00"N, 05°28'00"E | 5        | -         |
| <i>A. tazaotana</i>       | JebelTazaot                    | Morocco | 35°20'06"N, 05°09'31"W | 5        | SEV277703 |
| <i>A. marocana</i>        | Talassemtane                   | Morocco | 35°10'43"N, 05°14'03"W | 3        | SEV165953 |
|                           | Adeldal                        | Morocco | 35°11'05"N, 05°05'14"W | 2        | SEV165953 |
